1        **Effective connectivity reveals distinctive patterns in response to others' genuine affective**

2                                **experience of disgust as compared to pain**

3                                Yili Zhao<sup>1</sup>, Lei Zhang<sup>1</sup>, Markus Rütgen<sup>1,2</sup>, Ronald Sladky<sup>1</sup>, Claus Lamm<sup>1,2\*</sup>

4        <sup>1</sup> Social, Cognitive and Affective Neuroscience Unit, Department of Cognition, Emotion, and Methods

5        in Psychology, Faculty of Psychology, University of Vienna, Liebiggasse 5, 1010 Vienna, Austria

6        <sup>2</sup>Vienna Cognitive Science Hub, University of Vienna, Liebiggasse 5, 1010 Vienna, Austria

7

8        \* **Correspondence:** Claus Lamm, Department of Cognition, Emotion, and Methods in Psychology,

9        Faculty of Psychology, University of Vienna, Liebiggasse 5, 1010 Vienna, Austria.

10        Email: [claus.lamm@univie.ac.at](mailto:claus.lamm@univie.ac.at)

11        TEL: +43-1-4277-471 30

12        **Abbreviated title (< 50 characters):** neural dynamics of empathy for genuine disgust

13        **Number of Figures and Tables:** 3 figures, 1 table

14        **Number of words for abstract, introduction, and discussion:** 250 words for abstract, 566 words for

15        introduction, 1543 words for discussion.

16        **Conflicts of interest:** the authors declare no competing financial interests.

17        **Acknowledgements:** this work was supported by Chinese Scholarship Council (CSC) Grant

18        (201604910515) and Vienna Doctoral School in Cognition, Behavior and Neuroscience (VDS CoBeNe)

19        completion grant fellowship to Y.Z.; the Vienna Science and Technology Fund (WWTF VRG13-007) to

20        C.L., and the Austrian Science Fund (FWF P 32686) to C.L. and M.R..

21

22 **Abstract**

23 Empathy is significantly influenced by the identification of others' emotions. In a recent study, we  
24 have found increased activation in the anterior insular cortex (aIns) that could be attributed to affect  
25 sharing rather than perceptual saliency, when seeing another person genuinely experiencing pain as  
26 opposed to merely acting to be in pain. This study further revealed effective connectivity between  
27 aIns and the right supramarginal gyrus (rSMG) to track what another person really feels. In the  
28 present study, we used a similar paradigm to investigate the corresponding neural signatures in the  
29 domain of empathy for disgust - with participants seeing others genuinely sniffing unpleasant odors  
30 as compared to pretending to smell something disgusting. Consistent with the previous findings on  
31 pain, we found stronger activations in aIns associated with affect sharing for genuine disgust  
32 compared with pretended disgust. However, instead of rSMG we found engagement of the olfactory  
33 cortex. Using dynamic causal modeling (DCM), we estimated the neural dynamics of aIns and the  
34 olfactory cortex between the genuine and pretended conditions. This revealed an increased  
35 excitatory modulatory effect for genuine disgust compared to pretended disgust. For genuine  
36 disgust only, brain-to-behavior regression analyses highlighted a link between the observed  
37 modulatory effect and the perspective-taking empathic trait. Altogether, the current findings  
38 complement and expand our previous work, by showing that perceptual saliency alone does not  
39 explain responses in the insular cortex. Moreover, it reveals that different brain networks are  
40 implicated in a modality-specific way when sharing the affective experiences associated with pain vs.  
41 disgust.

42

43 **Significant statement**

44 Others' feelings influence our own feelings, no matter whether these feelings are genuine or merely  
45 pretended. In our previous study, we have shown the interaction of the region related to affect  
46 sharing and affective self-other distinction allowed us to track others' genuine experiences of pain vs.  
47 pretended pain. Here, we adopted a similar paradigm but in the domain of empathy for disgust.

48 Results indicate both similar and distinct brain networks that are engaged when sharing others'  
49 affective experiences of pain and disgust. This suggests that we could clearly distinguish others'  
50 feelings of genuinely aversive experiences as compared to pretended affects, while domain-specific  
51 neural underpinnings might play a role in response to different affective experiences related to pain  
52 vs. disgust.

53

54

55 **Introduction**

56 Our affective states are remarkably affected by the perceived feelings of others. A theoretical  
57 framework of empathy proposed by Coll et al. (2017) states that identification of another's emotion  
58 crucially contributes to the consequential sharing of feelings with that person. A recent study by our  
59 group has revealed that when individuals witness another person genuinely experiencing pain as  
60 compared to merely acting to be in pain, they attribute more painful feelings to that person and  
61 report experiencing stronger self-unpleasantness in response to the other's genuine pain (Zhao et al.,  
62 2021b).

63 On the neural level, that study found increased brain activations for the genuine compared to the  
64 pretended pain in the anterior insular cortex (aIns) and the anterior mid-cingulate cortex (aMCC), i.e.,  
65 a network that has been consistently associated with affective responding in studies on self-  
66 experienced pain as well as empathy for pain (Lamm et al., 2011; Rütgen et al., 2015; Jauniaux et al.,  
67 2019; Xiong et al., 2019; F. Zhou et al., 2020; Fallon et al., 2020, for meta-analyses). One major  
68 contribution of our previous study is that we have shown aIns, a key node of this neural network, is  
69 indeed associated with affect sharing, rather than being driven by the perceptual saliency of the  
70 facial expressions of pain. Moreover, by means of dynamic causal modeling (DCM) analyses,  
71 distinctive effective connectivity of genuine pain vs. pretended pain has been found on the  
72 connection between aIns and the right supramarginal gyrus (rSMG), a region selectively related to  
73 affective self-other distinction (Silani et al., 2013; Steinbeis et al., 2015; Hoffmann et al., 2016;  
74 Bukowski et al., 2020). This suggests that the interaction of aIns and rSMG tracks how we identify  
75 and share the actual feelings of another person, allowing an observer to engage in appropriate affect  
76 sharing rather than simply responding to salient, yet possibly non-genuine displays of pain.

77 What remains an open question is whether these findings are specific to pain or could be extended  
78 to other aversive experiences. Among the array of aversive experiences, the emotion of disgust  
79 partially overlaps with pain regarding its neural mechanisms (Corradi-Dell'Acqua et al., 2016). Also,

80 disgust and pain share similarities with respect to their facial expression (Zhao et al., 2021a) and are  
81 similarly important for survival and somatic protection (Sharvit et al., 2015; Sharvit et al., 2020).  
82 Particularly, research using multi-voxel pattern analysis (MVPA) shows overlapping brain maps in  
83 alns and aMCC not only for self-experienced but also vicarious experiences of pain and disgust,  
84 suggesting a modality-independent representation of the unpleasantness shared by self-experienced  
85 aversive affect and empathy for such affect (Corradi-Dell'Acqua et al., 2016).

86 The aim of the present study was, thus, to replicate and expand the findings of our previous study on  
87 pain (Zhao et al., 2021b), but targeting the emotion of disgust. Specifically, participants watched  
88 video clips either presenting a person showing a disgust expression when sniffing something  
89 unpleasant, or merely displaying a disgust expression without genuinely smelling any unpleasant  
90 odor. We expected to find that 1) on the behavioral level, genuine disgust would result in higher  
91 other-oriented disgust ratings and self-oriented unpleasantness ratings; 2) on the neural level, alns,  
92 aMCC, and rSMG would show stronger responses to the genuine disgust, as compared to pretended  
93 disgust; and 3) distinct patterns of alns' effective connectivity with rSMG would be found, and  
94 explain the different empathic responses to genuine vs. pretended disgust in a similar way as for  
95 pain.

## 96 **Materials and Methods**

97 To maximize comparability, data collection for the current study had been planned and performed  
98 together with the study focusing on pain (Zhao et al., 2021b). Thus, all procedures of both studies  
99 (i.e., creation and validation of stimuli, the pilot study, and the main fMRI experiment) were exactly  
100 conducted in the same sessions and with the identical participant sample. We decided to analyze  
101 and report them separately for reasons of reporting complexity and as the two reports have a  
102 different focus. While the details about all procedures are fully documented in (Zhao et al., 2021b),  
103 for ease of access, we also summarize the main points relevant to the current study herein.

## 104 **Participants**

105 Forty-eight participants participated in this study. This sample size was estimated a priori using  
106 Gpower 3.1 (Faul et al., 2007), for which a minimum sample size statistically required for this study  
107 was 34 with a medium effect size of Cohen's  $d = 0.5$  ( $\alpha = 0.05$ , two-tailed,  $1 - \beta = 0.80$ ). Three  
108 participants (only for the current study) were excluded because of excessive head motion ( $> 15\%$   
109 scans with the frame-wise displacement over 0.5 mm in one session; same criteria as the pain study).  
110 Data of the remaining 45 participants (21 females; age: Mean = 26.76 years, S.D. = 4.58) were  
111 entered into analyses. Participants had normal or corrected to normal vision and were pre-screened  
112 by an MRI safety-check questionnaire to assure no presence or history of neurologic, psychiatric, or  
113 major medical disorders. All participants reported being right-handed and signed the informed  
114 consent. The study was approved by the ethics committee of the Medical University of Vienna and  
115 was conducted in accordance with the latest revision of the Declaration of Helsinki (2013).

#### 116 **Manipulation of facial expressions**

117 In strict analogy to the stimuli we created for pain, the stimuli we created for this study consisted of  
118 video clips showing different demonstrators ostensibly in four different situations: 1) Genuine  
119 disgust: the demonstrator sniffed dog feces in an *opened* bottle with a picture depicting dog feces on  
120 it; the demonstrator's facial expression changed from neutral to strongly disgusted. 2) Genuine no  
121 disgust: the demonstrator sniffed cotton balls in an opened bottle with a picture depicting cotton  
122 balls on it; the demonstrator's facial expression maintained neutral. 3) Pretended disgust: the  
123 demonstrator sniffed dog feces in a *closed* bottle (covered by a cap) with a picture depicting dog  
124 feces on it; the demonstrator's facial expression changed from neutral to strongly disgusted. 4)  
125 Pretended no disgust: the demonstrator sniffed cotton balls in an opened bottle with a picture  
126 depicting cotton balls on it; the demonstrator's facial expression maintained neutral.  
127 Twenty demonstrators (10 females), with experience in acting, were recruited for creating the  
128 stimuli of the current study. Each demonstrator signed the agreement of using their videos clips and  
129 static images for scientific purposes. An experimenter who stood on the right side of the

130 demonstrators, of whom only the right hand holding the bottle could be seen, moved the bottle  
131 from the demonstrator's right side and stopped it just below the demonstrator's nose. Unbeknownst  
132 to the participants, all disgusted expressions were acted and the so-called "dog feces" were actually  
133 an odor-neutral object that resembled dog feces. As soon as the bottle was close enough to the  
134 demonstrator's nose (just below the right nostril), the demonstrator started to make a disgusted  
135 facial expression along with a slightly avoidant movement of their head, as naturally and vividly as  
136 possible. In the neutral control conditions, demonstrators maintained a neutral facial expression  
137 during the whole process of the bottle movement. Note that, the reason for presenting the pictures  
138 and supposed content of dog feces in both disgust conditions was because we deemed it essential to  
139 match the conditions in terms of the presence and visibility of an aversive disgusting object  
140 approaching the other person's face. Otherwise, any difference between conditions could be  
141 confounded by responses of participants to the presence vs. absence of a disgusting object and its  
142 explicit photographic display. Note that the pain condition of our previous work also followed this  
143 logic, with a needle covered by a plastic cap approaching the cheek.

#### 144 **Stimulus validation and pilot study**

145 To validate the stimuli, 110 participants (59 females; age: Mean = 29.32 years, S.D. =10.17) were  
146 recruited and asked to rate a total of 120 video clips of 2 s duration of the two conditions (60 of each  
147 condition) showing disgusted facial expressions (i.e., the genuine and pretended disgust conditions).  
148 The main aim of the validation study was to identify a set of demonstrators that expressed disgust  
149 with comparable intensity and quality, and whose expressions of disgust in the genuine and  
150 pretended conditions were comparable. After each video clip, participants rated three questions on  
151 a visual analog scale with 9 tick-marks and the two end-points marked as "almost not at all" to  
152 "unbearable": 1) How much disgust did the person *express* on his/her face? 2) How much disgust did  
153 the person *actually feel*? 3) How unpleasant *did you feel* to watch the person in this situation? These  
154 questions were presented in a pseudo-randomized order. Moreover, we set eight catch trials to test

155 whether participants maintained attention to the stimuli, in which participants were required to  
156 correctly choose the demonstrator they had seen in the last video, from two static images showing  
157 either the correct demonstrator's or a distractor's neutral facial expression side by side.

158 Data collection was performed with the online survey platform SoSci Survey  
159 (<https://www.socisurvey.de>), and participants got access to the survey through a participation  
160 invite published on Amazon Mechanical Turk (<https://www.mturk.com/>). Survey data of 62 out of  
161 110 participants (34 females; age: Mean = 28.71 years, S.D. =10.11) were entered into the analysis  
162 (inclusion criteria: false rate for the test questions < 2/8, survey duration > 20 min and < 150 min,  
163 and the maximum number of continuous identical ratings < 5). According to the validation analysis,  
164 videos of 6 demonstrators (3 females) were excluded for which participants showed a significant  
165 difference in perceived disgust expressions in others between genuine disgust and pretended  
166 disgust. As a result of this validation, videos of 14 demonstrators (7 females) were selected for the  
167 subsequent pilot study.

168 In the pilot study, a separate group (N =47, 24 females; age: Mean = 26.28 years, S.D. = 8.80) were  
169 recruited for a behavioral experiment in the behavioral laboratory. All conditions including the  
170 neutral conditions described above were presented to the participants to test the feasibility of the  
171 procedures that we intended to use in the following fMRI experiment. Participants were explicitly  
172 instructed that they would watch other persons' genuine expressions of disgust in some blocks,  
173 while in other blocks, they would see other persons acting out disgust expressions (recall that in  
174 reality, all demonstrators had been actors). All demonstrators showed neutral expressions as well.  
175 The three questions mentioned above were required to be rated. According to the video screening,  
176 we excluded videos of two demonstrators (1 female) for whom participants showed a large  
177 difference in ratings of *expression* of disgust between pretended vs. genuine conditions. Three  
178 separate repeated-measures ANOVAs were respectively performed for the three rating questions  
179 regarding the remaining videos. For the disgusted expressions in others, the main effect of



180 genuineness (genuine vs. pretended) was not significant and was low in effect size ( $F_{\text{genuineness}}(1, 46)$   
181  $= 0.867$ ,  $p = 0.357$ ,  $\eta^2 = 0.018$ ), but it was significant and showed high effect size for the disgusted  
182 feelings in others ( $F_{\text{genuineness}}(1, 46) = 207.225$ ,  $p < 0.001$ ,  $\eta^2 = 0.818$ ) as well as for the  
183 unpleasantness in self ( $F_{\text{genuineness}}(1, 46) = 21.360$ ,  $p < 0.001$ ,  $\eta^2 = 0.317$ ). The main effects of disgust  
184 (disgust vs. no disgust) for all three ratings were significant with high effect size (the smallest effect  
185 size was for the rating of unpleasantness in self,  $F_{\text{disgust}}(1, 46) = 44.489$ ,  $p < 0.001$ ,  $\eta^2 = 0.492$ ). The  
186 findings of our pilot study for the domain of disgust were thus very much in line with the findings of  
187 the same pilot study for the domain of pain (see Zhao et al., 2021b). Finally, video clips of 12  
188 demonstrators (6 females) were determined for the main fMRI experiment.

### 189 **Experimental design and procedures of the fMRI study**

190 The experimental design and procedures are sketched in Figure 1A and 1B. The fMRI experiment was  
191 performed in two runs, and each run consisted of two blocks showing genuine disgust and two  
192 blocks showing pretended disgust. In each block, participants watched nine video clips containing  
193 both disgusted and neutral videos.

194 After the scanner session, participants came on another day to complete three questionnaires in the  
195 lab: the Empathy Components Questionnaire (ECQ), the Interpersonal Reactivity Index (IRI), and the  
196 Toronto Alexithymia Scale (TAS). The ECQ is categorized into Five subscales with 27 items (i.e.,  
197 cognitive ability, cognitive drive, affective ability, affective drive, and affective reactivity), using a 4-  
198 point Likert scale ranging from 1 (“strongly disagree”) to 4 (“strongly agree”) (Batchelder, 2015;  
199 Batchelder et al., 2017). The IRI is divided into four subscales with 28 items (i.e., perspective taking,  
200 fantasy, empathic concern, and personal distress), using a 5-point Likert scale ranging from 0 (“does  
201 not describe me well”) to 4 (“describes me very well”) (Davis, 1980). The TAS is composed of three  
202 subscales with 20 items (i.e., difficulty describing feelings, difficulty identifying feelings, and  
203 externally oriented thinking), using a 5-point Likert scale ranging from 1 (“strongly disagree”) to 5  
204 (“strongly agree”) (Bagby et al., 1994). Participants were debriefed at the end of the whole study.

## 205 **Behavioral data analysis**

206 Repeated-measures ANOVAs were run in SPSS (version 26.0; IBM) to investigate the main effects  
207 and the interaction of the two factors genuine vs. pretended and disgust vs. no disgust. Furthermore,  
208 we conducted Pearson correlations to examine whether ratings of disgust feelings in others were  
209 correlated with unpleasantness in self for the genuine disgust and the pretended disgust. The  
210 comparison of the correlation coefficients was performed using a bootstrap approach with the R  
211 package bootcorci (<https://github.com/GRousselet/bootcorci>).

## 212 **fMRI data acquisition**

213 We used a Siemens Magnetom Skyra MRI scanner (Siemens, Erlangen, Germany) with a 32-channel  
214 head coil to collect fMRI data. A multiband-accelerated T2\*-weighted echoplanar imaging (EPI)  
215 sequence was applied to collect functional whole-brain scans (TR = 1200 ms, TE = 34 ms, acquisition  
216 matrix =  $96 \times 96$  voxels, FOV =  $210 \times 210$  mm<sup>2</sup>, flip angle = 66°, inter-slice gap = 0.4 mm, voxel size =  
217  $2.2 \times 2.2 \times 2$  mm<sup>3</sup>, multiband acceleration factor = 4, interleaved ascending acquisition in multi-slice  
218 mode, 52 slices co-planar to the connecting line between anterior and posterior commissure). Each  
219 of the two functional imaging runs lasted around 16 min (~800 images per run). A magnetization-  
220 prepared rapid gradient-echo (MPRAGE) sequence was implemented to acquire structural images  
221 (TE/TR = 2.43/2300 ms, FOV =  $240 \times 240$  mm<sup>2</sup>, flip angle = 8°, voxel size =  $0.8 \times 0.8 \times 0.8$  mm<sup>3</sup>, slice  
222 thickness = 0.8 mm, ascending acquisition, 208 sagittal slices, single-shot multi-slice mode).

## 223 **fMRI data processing and mass-univariate functional segregation analyses**

224 Imaging data preprocessing was performed with a combination of Nipype (Gorgolewski et al., 2011)  
225 and MATLAB (version R2018b 9.5.0; MathWorks) with Statistical Parametric Mapping (SPM12;  
226 <https://www.fil.ion.ucl.ac.uk/spm/software/spm12/>). Raw data were arranged into BIDS format  
227 (<http://bids.neuroimaging.io/>; Gorgolewski et al., 2016). Functional data were 1) slice time corrected  
228 to the middle slice (Sladky et al., 2011), realigned to the first image of each session, 3) co-registered

229 to the T1 image, 4) segmented between grey matter, white matter, and cerebrospinal fluid (CSF), 5)  
230 normalized to MNI template space using Diffeomorphic Anatomical Registration Through  
231 Exponentiated Lie Algebra (DARTEL) toolbox (Ashburner, 2007), and 6) smoothed using a 6 mm full  
232 width at half-maximum (FWHM) of the Gaussian kernel. To improve data quality, scrubbing was  
233 performed when the frame-wise displacement (FD) of a scan was larger than 0.5 mm (Power et al.,  
234 2012; Power et al., 2014).

235 In order to perform mass-univariate functional segregation analyses, we created a first-level GLM  
236 design matrix composed of two identically modeled runs for each participant. Seven regressors of  
237 interest were entered in each model: stimulation phase of the four conditions (i.e., genuine disgust,  
238 genuine no disgust, pretended disgust, pretended no disgust; 2000 ms), rating phase of the three  
239 questions (i.e., disgusted expressions in others, disgusted feelings in others, and unpleasantness in  
240 self; 12000 ms). Six head motion parameters and the scrubbing regressors (FD > 0.5 mm; if  
241 applicable) were additionally entered as nuisance regressors.

242 On the second level, we used a flexible factorial design for the group-level analysis. Three factors  
243 were included: a between-subject factor (i.e., subject) that was specified independent and with  
244 equal variance, a within-subject factor (i.e., genuine or pretended) that was specified dependent and  
245 with equal variance, and a second within-subject factor (i.e., disgust or no disgust) that was specified  
246 dependent and with equal variance were included in the design (Gläscher & Gitelman, 2008). Four  
247 contrasts were computed: 1) genuine: disgust – no disgust, 2) pretended: disgust – no disgust, 3)  
248 genuine disgust – pretended disgust, and 4) genuine (disgust – no disgust) – pretended (disgust – no  
249 disgust). An initial threshold of  $p < 0.001$  (uncorrected) at the voxel level and a family-wise error  
250 (FWE) correction ( $p \leq 0.05$ ) at the cluster level were applied. The cluster extent threshold was  
251 determined by the SPM extension “cp\_cluster\_Pthresh.m” (<https://goo.gl/kjVydZ>).

252 **Brain-behavior relationships**

253 We built a multiple regression model on the group level to investigate the relationship between  
254 specific brain activations and behavioral ratings. In this model, the contrast genuine disgust –  
255 pretended disgust was set as the dependent variable, and differences between conditions for three  
256 behavioral ratings were specified as independent variables. The reason that we entered the  
257 condition differences for both brain signals and behavioral ratings into the analyses was to control  
258 for the potential effects of perceptual salience. Moreover, we used the contrast genuine disgust –  
259 pretended disgust instead of the more exhaustive contrast genuine (disgust – no disgust) –  
260 pretended (disgust – no disgust), because our aim was to focus on the genuine and pretended  
261 disgust conditions rather than the neutral conditions. In addition, the disgust contrast showed more  
262 robust (in terms of statistical effect size) and widespread activations across the brain, making it more  
263 likely to pick up possible brain-behavior relationships. The same threshold as above (i.e., cluster-wise  
264 FWE correction,  $p < 0.05$ ) was applied in this analysis. All covariates were mean-centered. An  
265 intercept was added to the model.

#### 266 **Analyses using dynamic causal modeling (DCM)**

267 We considered the following regions of interest (ROI) for the DCM model space: the right aIns and  
268 rSMG according to the previous study of pain (Zhao et al., 2021b) and the left (primary) olfactory  
269 cortex according to the exploratory analyses. As for the latter, the results showed no evidence that  
270 effective connectivity between aIns and rSMG for genuine disgust vs. pretended disgust was distinct.  
271 Therefore, we extended the analysis to the primary olfactory cortex, which was not hypothesized  
272 when planning this study but highly plausible given the employed task and the specific link between  
273 olfaction and disgust. In fact, previous studies indeed demonstrated the olfactory cortex was not  
274 only engaged in perceptual processes (e.g., odor perception and recognition), but also in affective  
275 processing of disgust-related experiences (Gottfried et al., 2002; Zelano et al., 2011; Alessandrini et  
276 al., 2016; Schulze et al., 2017; Schienle et al., 2020). We additionally defined an ROI of the right  
277 olfactory cortex as a comparison to the left olfactory cortex. The ROI masks were defined as the

278 anatomical masks created by the Wake Forest University (WFU) Pick Atlas SPM toolbox  
279 (<http://fmri.wfubmc.edu>) with the automated anatomical atlas (AAL). Note that the olfactory cortex  
280 mask defined in AAL largely overlaps with the primary olfactory cortex that we were interested in  
281 (Desikan et al., 2006).

282 Three DCM analyses were performed based on different considerations. Firstly, to investigate if the  
283 distinct effective connectivity between aIns and rSMG we have found between genuine pain and  
284 pretend pain could be observed in disgust as well, we performed a DCM analysis between the right  
285 aIns and rSMG under the manipulation of genuine disgust and pretended disgust. Secondly, to  
286 explore if other brain patterns could dissociate genuine disgust and pretended disgust, we  
287 performed a second DCM analysis between the right aIns and the left olfactory cortex. Finally, to test  
288 the robustness of the second DCM model, we performed a third DCM analysis between the right  
289 aIns and the right olfactory cortex.

290 All DCM analyses were performed with DCM12.5 implemented in SPM12 (v. 7771). As a first step,  
291 individual time series were extracted separately for each ROI. The voxels were determined both on a  
292 group-level and an individual-level threshold to ensure the selected voxel were indeed engaged in a  
293 task-relevant activity instead of random signal fluctuations (Holmes et al., 2020). The initial  
294 threshold was set as  $p < 0.05$ , uncorrected. The significant voxels in the main effect of genuine  
295 disgust and pretended disgust were further selected by an individual threshold. An individual peak  
296 coordinate within the ROI mask was searched for each participant and an individual mask was  
297 consequently defined using a sphere of the 6 mm radius around the peak. The individual time series  
298 for each ROI was subsequently extracted from the significant voxels of the individual mask and  
299 summarized by the first eigenvariate. For the second and third DCM analyses, seven participants  
300 were excluded as no voxels survived significance testing in either the left or right olfactory cortex. In  
301 the next step, three regressors of interest were specified: genuine disgust, pretended disgust, and  
302 the video input condition (the combination of genuine disgust and pretended disgust). The reasons

303 for not specifying the no-disgust conditions were that 1) disgust conditions were our main focus, and  
304 2) adding effects of non-interest would inevitably increase the model complexity. In DCM, three sets  
305 of parameters were estimated: bidirectional connections between the regions and their self-  
306 connections (matrix A), modulatory effects (i.e., genuine disgust and pretended disgust) on the  
307 between-region connections (matrix B), and driving inputs (i.e., the video input condition) on both  
308 regions (matrix C) (Zeidman et al., 2019a). Finally, we performed group-level DCM inference using  
309 parametric empirical Bayes (Zeidman et al., 2019b). An automatic search was conducted over the  
310 entire model space (max.  $n = 256$ ) using Bayesian model reduction (BMR) and random-effects  
311 Bayesian model averaging (BMA), resulting in a final group model that takes accuracy, complexity,  
312 and uncertainty into account (Zeidman et al., 2019b). This procedure was similarly performed for all  
313 three DCM analyses. We reported all parameters with positive evidence on the posterior probability  
314 ( $pp > 0.75$ ). Finally, modulatory effects of the genuine and pretended disgust conditions were  
315 compared using a paired sample t-test for each group-averaged model.

316 To probe whether task-related modulatory effects were associated with behavioral measurements,  
317 we performed multiple linear regression analyses of modulatory parameters with, 1) the three  
318 behavioral ratings, and 2) the empathy-related questionnaires (i.e., IRI, ECQ, and TAS). We set up  
319 two regression models for the genuine and pretended disgust conditions, respectively, in which the  
320 DCM parameters of modulatory effects were determined as dependent variables and the three  
321 ratings as independent variables. Considering that interactions between behavioral ratings might  
322 contribute to the regression model, five regression models (with and without interaction) were  
323 tested for both conditions. Results showed the model without any interaction outperformed other  
324 models for both genuine disgust (AIC = -27.422, BIC = -19.234) and pretended disgust (AIC = -10.697,  
325 BIC = -2.509). Smaller AIC/BIC indicates better model fit. The model with an interaction of disgusted  
326 expressions and disgusted feelings in others showed the smallest AIC and BIC among all models with  
327 interactions for both conditions: for genuine disgust, AIC = -25.547, BIC = -15.722; for pretended  
328 disgust, AIC = -10.650, BIC = -0.824. We will thus report the results of the winning multiple

329 regression model in the results section. We performed two additional regression models for both  
330 conditions in which DCM modulatory effects were set as dependent variables and scores of each  
331 questionnaire subscale were set as independent variables, respectively. Given the number of  
332 independent variables was considerable (>10), we used a stepwise regression approach to perform  
333 the analyses for questionnaires. As two participants did not complete all three questionnaires, we  
334 excluded their data from the regression analyses. The statistical significance of the regression  
335 analysis was set to  $p < 0.05$ . The multicollinearity for independent variables was diagnosed using the  
336 variance inflation factor (VIF) that measures the correlation among independent variables, in the R  
337 package car (<https://cran.r-project.org/web/packages/car/index.html>). Here a rather conservative  
338 threshold of  $VIF < 5$  was adapted as an indication of no severe multicollinearity (Menard, 2002;  
339 James et al., 2013).

340

## 341 **Results**

### 342 **Behavioral results**

343 We performed three repeated-measures ANOVAs with the factors *genuineness* (genuine vs.  
344 pretended) and *disgust* (disgust vs. no disgust), for each of the three behavioral ratings. For ratings  
345 of disgusted *expressions* in others (Figure 1C, left), the main effect of the factor genuineness was not  
346 significant:  $F_{\text{genuineness}}(1, 44) = 1.861, p = 0.179, \eta^2 = 0.041$ . There was a main effect of disgust:  
347 participants showed higher ratings for the disgust vs. no disgust conditions,  $F_{\text{disgust}}(1, 44) = 1769.396,$   
348  $p < 0.001, \eta^2 = 0.976$ . The interaction term was not significant,  $F_{\text{interaction}}(1, 44) = 2.270, p = 0.139, \eta^2$   
349  $= 0.049$ . For ratings of disgusted feelings in others (Figure 1C, middle), there was a main effect of  
350 genuineness: participants showed higher ratings for the genuine vs. pretended conditions,  $F_{\text{genuineness}}$   
351  $(1, 44) = 510.686, p < 0.001, \eta^2 = 0.921$ . There was also a main effect of disgust, as participants  
352 showed higher ratings for the disgust vs. no disgust conditions,  $F_{\text{disgust}}(1, 44) = 854.136, p < 0.001, \eta^2$   
353  $= 0.951$ . The interaction was significant as well,  $F_{\text{interaction}}(1, 44) = 360.516, p < 0.001, \eta^2 = 0.891$ , and

354 this was related to higher ratings of disgusted feelings in others for the genuine disgust compared to  
355 the pretended disgust condition. For ratings of unpleasantness in self (Figure 1C, right), there was a  
356 main effect of genuineness: participants showed higher ratings for the genuine vs. pretended  
357 conditions,  $F_{\text{genuineness}}(1, 44) = 37.694$ ,  $p < 0.001$ ,  $\eta^2 = 0.461$ . There was also a main effect of disgust:  
358 participants showed higher ratings for the disgust vs. no disgust conditions,  $F_{\text{disgust}}(1, 44) = 141.277$ ,  
359  $p < 0.001$ ,  $\eta^2 = 0.763$ . The interaction was significant as well,  $F_{\text{interaction}}(1, 44) = 32.341$ ,  $p < 0.001$ ,  $\eta^2 =$   
360  $0.424$ , and this was related to higher ratings of unpleasantness in self for the genuine disgust  
361 compared to the pretended disgust condition. In sum, the behavioral data indicated that there was  
362 no difference in ratings of disgusted expression in others between the genuine and pretended  
363 disgust conditions, while higher ratings and large effect sizes of disgusted feelings in others and  
364 unpleasantness in self for the genuine disgust condition as compared to the pretended disgust  
365 condition. These results were perfectly in line with our hypotheses and what we found in the pilot  
366 study.

367 We also found significant correlations between behavioral ratings of disgusted feelings in others and  
368 unpleasantness in self for the genuine disgust condition,  $r = 0.548$ ,  $p < 0.001$ ; while for the  
369 pretended disgust condition, the correlation was not significant,  $r = 0.051$ ,  $p = 0.740$  (Figure 1D). A  
370 bootstrapping comparison showed a significant difference between the two correlation coefficients,  
371  $p = 0.025$ , 95% Confidence Interval (CI) = [0.073, 0.860].



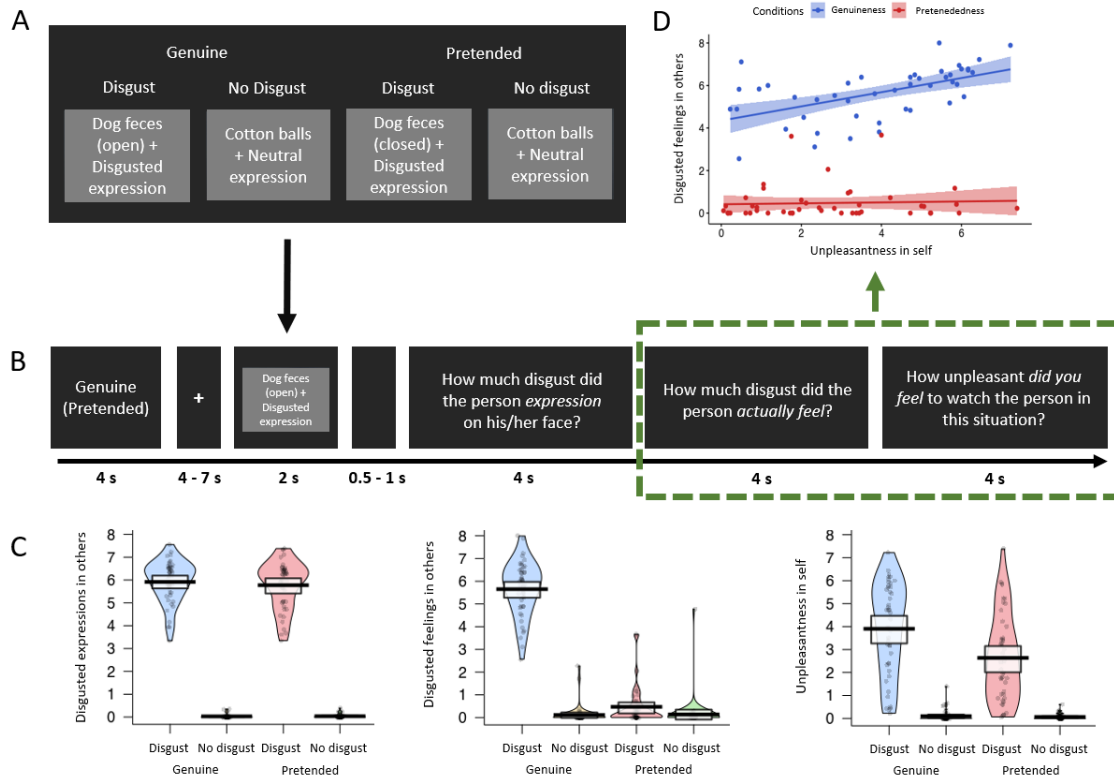

372

373 **Figure 1. fMRI experimental design and behavioral results.** (A) Overview of the experimental design  
 374 with the four conditions genuine vs. pretended, disgust vs. no disgust. Examples show static images,  
 375 while in the experiment, participants were shown video clips. (B) Overview of experimental timeline.  
 376 At the outset of each block, a reminder of “genuine” or “pretended” was shown (both terms are  
 377 shown here for illustrative purposes, in the experiment either genuine or pretended was displayed).  
 378 After a fixation cross, a video in the corresponding condition appeared on the screen. Followed by a  
 379 short jitter, three questions about the video were separately presented and had to be rated on a  
 380 visual analog scale. These would then be followed by the next video clip and questions (not shown).  
 381 (C) Violin plots of the three types of ratings for all conditions. No difference was found for the rating  
 382 of disgusted expressions in others between the genuine disgust condition and the pretended disgust  
 383 condition. For the ratings of disgusted feelings in others and unpleasantness in self, participants  
 384 demonstrated higher ratings for genuine disgust than pretended disgust. Ratings of all three  
 385 questions were higher in the disgusted situation than in the neutral situation, regardless of whether  
 386 in the genuine or pretended condition. The thick black lines illustrate mean values, and the white  
 387 boxes indicate a 95% CI. The dots are individual data, and the “violin” outlines illustrate their  
 388 estimated density at different points of the scale. (D) Correlations of disgusted feelings in others and  
 389 unpleasantness in self for the genuine disgust and the pretended disgust (the relevant questions  
 390 were highlighted with a green rectangular). Results revealed a significant Pearson correlation

391 between the two questions for the genuine disgust condition, but no correlation in the pretended  
392 disgust condition. The lines represent the fitted regression lines, bands indicate a 95% CI.

393

#### 394 **fMRI results: mass-univariate analysis**

395 We computed four contrasts: 1) genuine: disgust – no disgust, 2) pretended: disgust – no disgust, 3)  
396 genuine disgust – pretended disgust, and 4) genuine (disgust – no disgust) – pretended (disgust – no  
397 disgust). In the first two contrasts, we found the predicted activations in bilateral aIns, aMCC, and  
398 rSMG, as well as significant (not originally predicted) activation in the olfactory cortex; in the third  
399 contrast, we found significant activation in the right aIns, as well as strong activation ( $k = 255$ ) in the  
400 left olfactory cortex; in the last contrast, the only significant activation was found in the right  
401 cerebellum (Figure 2A and Table 1).

402 To identify whether or which brain activity was selectively related to the behavioral ratings  
403 described above, we performed a multiple regression analysis where we explored the relationship of  
404 activation in the contrast genuine disgust – pretended disgust with the three behavioral ratings. The  
405 only significant cluster we found encompassed the right aIns, extending into the right inferior frontal  
406 gyrus, and this was selectively related to ratings of self-unpleasantness (Figure 2B) rather than the  
407 ratings of disgusted expressions in others or the disgusted feelings in others.

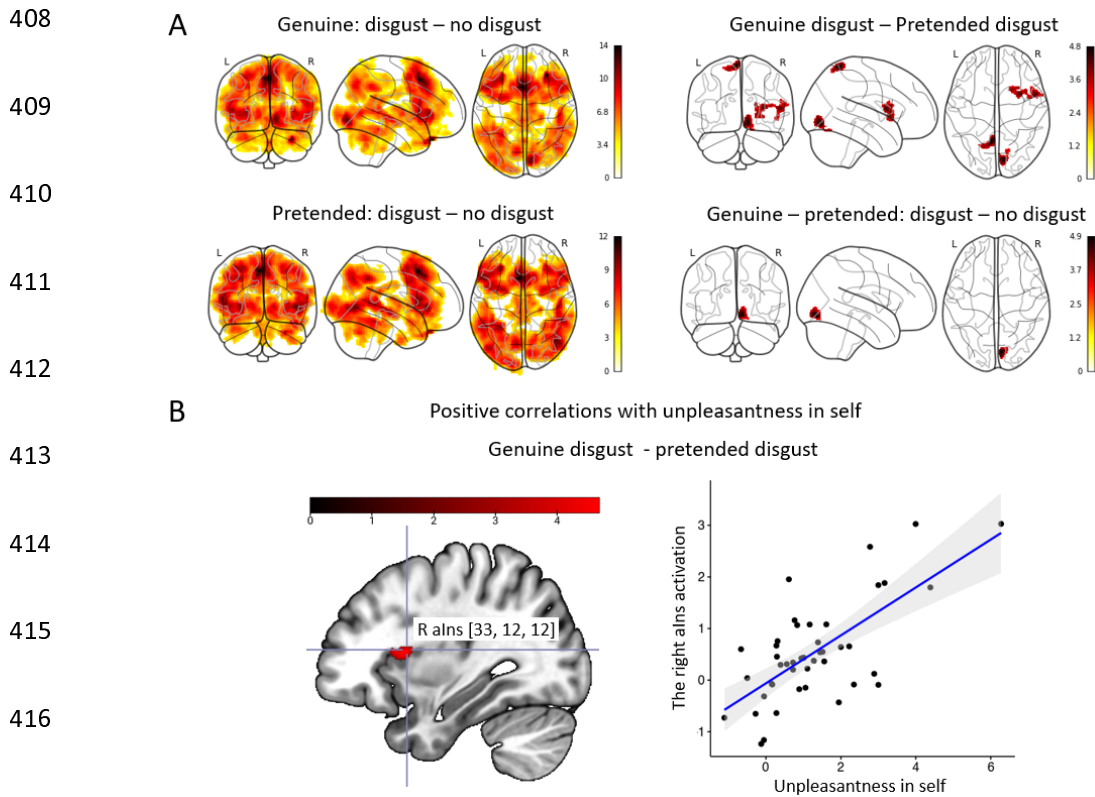

418 **Figure 2. Neuroimaging results: Mass-univariate analyses.** (A) Activation maps of genuine: disgust –  
419 no disgust (top left), pretended: disgust - no disgust (bottom left), genuine disgust – pretended  
420 disgust (top right), and genuine (disgust – no disgust) – pretended (disgust – no disgust) (bottom  
421 right). For contrasts of disgust –no disgust in both genuine and pretended conditions, we found  
422 expected brain activations in bilateral aIns, aMCC, and rSMG, and significant activation in the  
423 olfactory cortex; for the contrast of genuine disgust vs. pretended disgust, we found significant  
424 activation in the right aIns and strong activation in the left olfactory cortex (a cluster of  $k=255$ ,  
425 though not pass the threshold); for the contrast of genuine (disgust – no disgust) vs. pretended  
426 (disgust – no disgust), the only significant activation was in the right cerebellum. (B) The multiple  
427 regression analysis demonstrated a significant cluster in the right aIns (peak: [33, 12, 12]) that was  
428 positively associated with the ratings of unpleasantness in self but not associated with the ratings of  
429 either disgusted expressions in others or disgusted feelings in others when comparing genuine  
430 disgust vs. pretended disgust. All activations are thresholded with cluster-level FWE correction,  $p <$   
431 0.05 ( $p < 0.001$  uncorrected initial selection threshold). The lines of the scatterplots represent the  
432 fitted regression lines, bands indicate a 95% CI.

433

434 **Table 1.** Results of mass-univariate functional segregation analyses in the MNI space. Region names  
 435 were labeled with the AAL atlas and thresholded with cluster-wise FWE correction,  $p < 0.05$  (initial  
 436 selection threshold  $p < 0.001$ , uncorrected). BA = Brodmann area, L = left hemisphere, R = right  
 437 hemisphere.

| Region label                              | BA | Cluster size | x   | y   | z   | t-value |
|-------------------------------------------|----|--------------|-----|-----|-----|---------|
| <b>1) Genuine: disgust - no disgust</b>   |    |              |     |     |     |         |
| Temporal_Pole_Sup_R                       | 38 | 164988       | 32  | 33  | -33 | 13.57   |
| Supp_Motor_Area_L                         | 8  |              | -3  | 16  | 50  | 13.31   |
| Lingual_R                                 | 18 |              | 9   | -84 | -6  | 11.89   |
| Frontal_Sup_Medial_R                      | 8  |              | 6   | 21  | 45  | 10.95   |
| Insula_L                                  | 45 |              | -32 | 27  | 4   | 10.81   |
| Frontal_Inf_Oper_L                        | 44 |              | -50 | 15  | 6   | 10.80   |
| Insula_R                                  | 13 |              | 33  | 27  | 4   | 10.17   |
| Frontal_Inf_Tri_L                         | 45 |              | -30 | 32  | 0   | 10.12   |
| Frontal_Inf_Oper_R                        | 44 |              | 52  | 15  | 15  | 9.80    |
| Frontal_Inf_Orb_R                         | 47 |              | 32  | 32  | -3  | 9.69    |
| Lingual_L                                 | 17 | 422          | -21 | -66 | 4   | 5.10    |
| <b>2) Pretended: disgust - no disgust</b> |    |              |     |     |     |         |
| Supp_Motor_Area_L                         | 8  | 137060       | -4  | 16  | 50  | 11.95   |
| Frontal_Sup_Medial_L                      | 8  |              | -8  | 26  | 44  | 10.69   |
| Temporal_Mid_R                            | 19 |              | 44  | -68 | 2   | 10.35   |
| Frontal_Inf_Oper_L                        | 44 |              | -51 | 16  | 6   | 10.01   |
| Insula_L                                  | 45 |              | -30 | 30  | 2   | 9.77    |
| Frontal_Inf_Tri_L                         | 45 |              | -56 | 20  | 12  | 9.68    |
| Cingulum_Mid_R                            | 8  |              | 8   | 20  | 45  | 9.47    |
| Parietal_Inf_L                            | 39 |              | -32 | -51 | 40  | 9.37    |
| Temporal_Pole_Sup_R                       | 38 |              | 32  | 34  | -33 | 9.35    |
| Frontal_Mid_L                             | 6  |              | -27 | 2   | 54  | 9.26    |
| Cingulate_Post_L                          | 23 | 1821         | -4  | -42 | 22  | 5.71    |
| Cingulate_Mid_R                           | 23 |              | -3  | -26 | 27  | 5.58    |
| Cingulate_Post_R                          | 23 |              | 8   | -39 | 22  | 5.33    |
| Cingulate_Mid_L                           | 24 |              | -3  | -12 | 30  | 5.23    |
| Vermis_9                                  | 37 | 522          | 2   | -57 | -39 | 5.27    |
| Cerebelum_9_L                             | 18 |              | -2  | -60 | -46 | 4.55    |
| Cerebelum_9_R                             | 37 |              | 10  | -57 | -51 | 3.96    |
| Temporal_Inf_L                            | 20 | 517          | -40 | -9  | -38 | 4.80    |
| Temporal_Pole_Mid_L                       | 38 |              | -28 | 8   | -39 | 3.62    |

|                                                                             |    |     |     |     |     |      |
|-----------------------------------------------------------------------------|----|-----|-----|-----|-----|------|
| Cerebelum_Crus2_L                                                           | 18 | 487 | -8  | -76 | -34 | 5.15 |
| Cerebelum_Crus1_L                                                           | 18 |     | -18 | -80 | -27 | 3.21 |
| <b>3) Genuine disgust – pretended disgust</b>                               |    |     |     |     |     |      |
| Insula_R                                                                    | 44 | 976 | 32  | 8   | 12  | 4.56 |
| Rolandic_Oper_R                                                             | 44 |     | 54  | 8   | 10  | 4.38 |
| Caudate_R                                                                   | 48 |     | 21  | 14  | 15  | 4.05 |
| Putamen_R                                                                   | 49 |     | 30  | 16  | -2  | 3.89 |
| Frontal_Inf_Oper_R                                                          | 44 |     | 40  | 12  | 14  | 3.85 |
| Lingual_R                                                                   | 18 | 550 | 10  | -81 | -9  | 4.72 |
| Cerebelum_6_R                                                               | 18 |     | 15  | -70 | -18 | 3.35 |
| Precuneus_L                                                                 | 7  | 474 | -6  | -56 | 69  | 4.85 |
| Parietal_Sup_L                                                              | 7  |     | -16 | -63 | 64  | 3.95 |
| <b>4) Genuine (disgust – no disgust) – pretended (disgust – no disgust)</b> |    |     |     |     |     |      |
| Lingual_R                                                                   | 18 | 431 | 8   | -81 | -10 | 4.90 |

438

#### 439 **DCM results**

440 We first performed a DCM analysis of the effective connectivity between the right aIns and rSMG to  
 441 examine if the group-averaged model replicated what we found in our previous study on pain (Zhao  
 442 et al., 2021b). Specifically, we focused on the modulatory effect of genuineness, namely, whether  
 443 the experimental manipulation of genuine disgust vs. pretended disgust tuned the bidirectional  
 444 neural dynamics from aIns to rSMG and *vice versa*, in terms of both directionality (sign of the DCM  
 445 posterior parameter) and intensity (magnitude of the DCM posterior parameter). If the experimental  
 446 manipulation modulated the effective connectivity, we would observe a positive posterior  
 447 probability ( $p_p > 0.75$ ) of the modulatory effect. The reasons that we did not include aMCC in this  
 448 analysis were that 1) unlike aIns, in aMCC we did not find strong evidence for the task involvement  
 449 (in the univariate and multiple regression analyses), 2) for comparability of the present model with  
 450 the previous model on pain, where aMCC had not been included either.

451 Similar to what we found in the pain study, strong evidence ( $pp > 0.95$ ;  $pp = 1.00$ ) of inhibitory  
 452 modulatory effects on the aIns-to-rSMG connection was shown for both the genuine disgust  
 453 condition and the pretended disgust condition (see Figure 3A). However, we did not find a significant

454 difference when comparing the strength of these two modulatory effects,  $t_{44} = -1.045$ ,  $p = 0.302$   
455 (Mean<sub>genuine disgust</sub> = -1.214, 95% CI = [-1.462, -0.927]; Mean<sub>pretended disgust</sub> = -1.095, 95% CI = [-1.361, -  
456 0.799]). Note that the mean values we exhibit in the test could slightly differ from those shown in the  
457 DCM models of Figure 3, since we used frequentist statistics for comparison analysis rather than the  
458 Bayesian approach that was implemented to compute the parameters for the DCM model. We did  
459 not find robust evidence on the intrinsic connectivity either from alns to rSMG or *vice versa*.  
460 Moreover, there was no evidence of a modulatory effect on the rSMG to alns connection, which was  
461 in line with what we had found for pain. Taken together, the DCM analysis between alns and rSMG  
462 partially replicated the results of the pain study, namely the inhibitory modulatory effect from alns  
463 to rSMG for both genuine and pretended conditions; however, this inhibitory modulatory effect  
464 failed to dissociate the experimental manipulation of genuine disgust and pretended disgust,  
465 suggesting that a distinctive pattern or set of brain regions underpins how the genuineness of  
466 disgust is processed by our brains.

467 We therefore performed an exploratory DCM analysis to test whether distinct modulatory effects  
468 could be found for genuine and pretend disgust on the connection between the right alns and the  
469 left olfactory cortex (see Figure 3B). As mentioned in the methods sections, while the involvement of  
470 the left olfactory cortex was mainly exploratory and data-driven, it was also plausible on theoretical  
471 grounds. Results showed a significant excitatory effect for both genuine disgust (strong evidence,  $pp$   
472 = 1.00) and pretended disgust (positive evidence,  $pp = 0.93$ ) on the connection of the left olfactory  
473 cortex to the right alns. A further comparison analysis on the modulatory effect between conditions  
474 revealed a stronger excitatory modulatory effect for genuine disgust as opposed to pretended  
475 disgust,  $t_{37} = 4.450$ ,  $p < 0.001$  (Mean<sub>genuine disgust</sub> = 0.805, 95% CI = [0.755, 0.851]; Mean<sub>pretended disgust</sub> =  
476 0.573, 95% CI = [0.517, 0.628]). We did not find any modulatory effect on the reverse connection of  
477 the right alns to the left olfactory cortex.

478 Finally, to justify whether lateralization of the olfactory cortex largely influenced the robustness of  
479 the modulatory effect we found in the DCM model above, we performed an additional DCM analysis  
480 on the connection between the right alns and the right olfactory cortex (see Figure 3C). Results  
481 showed a similar group-average model to that of the right alns and the left olfactory cortex.  
482 Importantly, we replicated the excitatory modulatory effect on the connection of the olfactory  
483 cortex to alns in the sense of significant evidence for both conditions (genuine disgust: positive  
484 evidence,  $pp = 0.91$ ; pretended disgust: positive evidence,  $pp = 0.88$ ). No evidence of the modulatory  
485 effect on the connection of alns to the right olfactory cortex was found, which was consistent with  
486 the group-average model with the left olfactory cortex. A further comparison analysis did not find  
487 significant difference on the strength of the two modulatory effects,  $t_{37} = 0.595$ ,  $p = 0.556$  (Mean  
488  $_{\text{genuine disgust}} = 0.624$ , 95% CI = [0.503, 0.738]; Mean  $_{\text{pretended disgust}} = 0.577$ , 95% CI = [0.488, 0.678]).

#### 489 **Individual associations between modulatory effects, behavioral ratings, and questionnaires**

490 Two linear regression models were computed to examine how the excitatory modulatory effect on  
491 the connection of the (left) olfactory cortex to alns was related to behavioral ratings respectively for  
492 genuine disgust and pretended disgust. Results showed that none of the ratings was significant for  
493 either the genuine disgust model or the pretended disgust model. No severe collinearity problem  
494 was detected for either regression model (all  $VIFs < 4.500$ ; the smallest  $VIF = 1.229$  and the largest  
495  $VIF = 4.410$ ).

496 Another two linear regression models were tested to investigate whether subscales of all three  
497 questionnaires could explain the excitatory modulatory effect for genuine disgust and pretended  
498 disgust. For the genuine disgust condition, we found that the modulatory effect was significantly  
499 explained by scores of the perspective-taking subscale of the IRI:  $F_{\text{model}}(1, 35) = 4.177$ ,  $p = 0.049$ ,  $R^2 =$   
500  $0.109$ ;  $B = 0.011$ ,  $\beta = 0.331$ ,  $p = 0.049$ . No significant predictor was found with any subscale in the  
501 other two questionnaires (i.e., ECQ and TAS). None of the three questionnaires significantly  
502 explained variations of the modulatory effect for the pretended disgust condition. No severe

503 collinearity problem was detected for either regression model (all *VIFs* < 2.500; the smallest *VIF*  
 504 =1.000 and the largest *VIF* = 2.198).

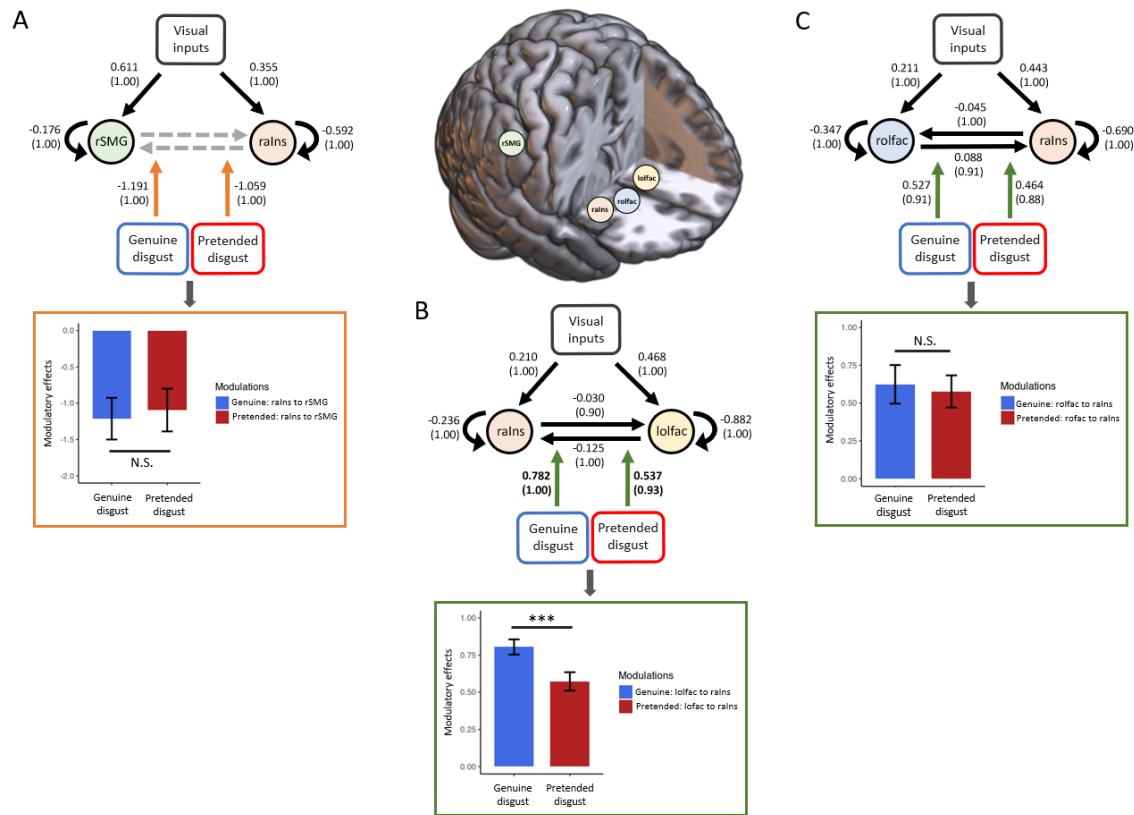

505

506 **Figure 3. DCM results and brain-behavior analyses.** Three-dimensional visualization of ROIs involved

507 in the three DCM analyses is shown in the upper middle. (A) The group-average DCM model of the

508 right anterior insula and the right supramarginal gyrus (rSMG) for genuine disgust and pretended

509 disgust. We found inhibitory modulatory effects (orange arrows) for both conditions. All DCM

510 parameters of the optimal model showed greater than a 99% posterior probability (very strong

511 evidence) except the bi-directionally intrinsic connectivity between the right alns (ralns) and rSMG

512 (grey dashed arrow; no evidence of existence,  $pp < 0.50$ ). Paired sample *t*-test showed no difference

513 in the inhibitory modulatory effects on the ralns-to-rSMG connection between genuine disgust and

514 pretended disgust. This result is highlighted with an orange rectangular. Data are mean  $\pm$  95% CI. (B)

515 The group-average DCM model of the ralns and the left olfactory cortex (lolfac) for genuine disgust



516 and pretended disgust. We found the excitatory modulatory effect (green arrows) for both  
517 conditions. All DCM parameters of the optimal model showed greater than or equal to a 90%  
518 posterior probability ( $pp > 0.75$ , positive evidence). Paired sample *t*-test showed a stronger  
519 excitatory modulatory effect of the lolfac-to-raInS connection for genuine disgust as compared to  
520 pretended disgust (\*\* $p < 0.001$ ). This result is highlighted with a green rectangular. Data are mean  
521  $\pm$  95% CI. (C) The group-average DCM model of the raInS and the right olfactory cortex (rolfac) for  
522 genuine disgust and pretended disgust. We found the excitatory modulatory effect (green arrows)  
523 for both conditions. All DCM parameters of the optimal model showed greater than a 75% posterior  
524 probability (positive evidence). Paired sample *t*-test showed no difference in the inhibitory  
525 modulatory effect on the rolfac-to-raInS connection between genuine disgust and pretended disgust.  
526 This result is highlighted with a green rectangular. Data are mean  $\pm$  95% CI. For all DCM models,  
527 values without the bracket quantify the strength of connections; positive values indicate neural  
528 excitation and negative values indicate neural excitation. Values in the bracket indicate the posterior  
529 probability of connections.

530

## 531 **Discussion**

532 Using a paradigm matched to our previously published study on pain (Zhao et al., 2021b), and in the  
533 same sample and experimental session, we here report how participants responded to video clips  
534 presenting people who supposedly either genuinely experienced disgust or merely pretended to feel  
535 disgusted. Combining mass-univariate analysis with effective connectivity (DCM) analyses, we aimed  
536 to clarify two main questions: 1) whether neural responses in areas such as aInS and aMCC to the  
537 disgust of others were indeed related to a veridical sharing of affect, as opposed to simply tracking  
538 sensory-driven responses to salient affective displays, and 2) whether the effective connectivity  
539 between aInS and rSMG that we previously found to disentangle genuine pain from pretended pain  
540 also enabled the dissociation of genuine disgust vs. pretended disgust.

541 We found increased activations in the right alns for genuine disgust as compared to pretended  
542 disgust that was selectively associated with the unpleasantness in self. These findings are in line with  
543 what we have found in pain (Zhao et al., 2021b), implying an essential role of alns in the processing  
544 of shared feelings with others for both pain and disgust. However, an intriguing question is if the  
545 alns activation we observed in these two aversive states reflects a form of cross-modal affective  
546 processing, or rather modality-dependent affective experiences? A study using multi-voxel pattern  
547 analysis (MVPA) has shown both cross-modal and modality-specific evidence in terms of the  
548 subfields of alns for pain and disgust: in the left alns (and aMCC), the shared encoding was detected  
549 for first-hand and vicarious pain and disgust, regardless of the same or different modality; while in  
550 the right alns, sensory-specific rather than modality-independent patterns were more plausible for  
551 processing first-hand and vicarious pain and disgust (Corradi-Dell'Acqua et al., 2016). Taken together,  
552 the alns activation we found suggests the engagement of affective processing that was related to  
553 others' pain and disgust, while future research that explicitly matches pain and disgust salience is  
554 required to further investigate whether this activation indicates cross-modal or modality-dependent  
555 affective experiences.

556 We found significant inhibitory modulatory effects on the connection of alns to rSMG for both  
557 genuine and pretended disgust, but these effects did not differ significantly. This implies that we  
558 only partially replicate the findings of the pain study: while we reproduce a role of the alns and  
559 rSMG connectivity, their crosstalk does not explain the distinction between genuine and pretended  
560 expressions of disgust, as is the case for pain (Zhao et al., 2021b). We speculate that the absence of  
561 differences between two conditions in rSMG activation as well as the inhibitory modulatory effect  
562 could be related to generally lower salience of aversive experiences in the disgust task compared to  
563 that of pain. Further investigation is required to test this assumption.

564 Contrary to our expectations, we did not find any significant activation in rSMG for genuine disgust  
565 as compared to pretended disgust; instead, we showed a relatively stronger engagement of the

566 primary olfactory cortex between conditions. As we mentioned beforehand, we did not target the  
567 latter area when planning the study but later included it inspired by the exploratory analysis. The  
568 (primary) olfactory cortex has been considered to mainly comprise the anterior olfactory nucleus,  
569 the olfactory tubercle, piriform cortices, and subregions of amygdala and entorhinal cortex (Savic et  
570 al., 2000; Tzourio-Mazoyer et al., 2002; G. Zhou et al., 2019). Studies have found that this region is  
571 recruited not only for direct olfactory sensations but also for the indirect experience of olfactory  
572 processing, such as odor imagery (Djordjevic et al., 2005; Bensafi et al., 2007) and odor prediction  
573 (Zelano et al., 2011). Olfactory priming could facilitate the identification of the emotion of disgust  
574 (Seubert et al., 2010a; Seubert et al., 2010b); in turn, priming with a disgusted face compared to a  
575 happy face enhanced activation in the olfactory cortex when processing pleasant odors (Schulze et  
576 al., 2017). These findings imply the engagement of the olfactory cortex in integrating olfactory  
577 processes with visually conveyed affective information. Furthermore, the primary olfactory cortex  
578 has been suggested to participate in processing the emotion of disgust, without necessarily  
579 experiencing sensory-related disgust. Compared with healthy controls, patients with reduced  
580 olfactory function (e.g., anosmia and hyposmia) have been found to identify less disgust for facial  
581 expressions of disgust and show greater activations in the primary olfactory cortex, suggestive of a  
582 compensatory effect, for disgusting scenes (Schienle et al., 2020). Altogether, the stronger  
583 engagement of the olfactory cortex might be related to a higher level of identified disgust in others  
584 when individuals observed others genuinely experiencing disgust compared with pretending  
585 disgusted.

586 The exploratory DCM analysis of the right aIns and the left olfactory cortex demonstrated a stronger  
587 excitatory modulatory effect on the olfactory cortex to aIns connection for genuine disgust as  
588 opposed to pretended disgust. Studies from nonhuman primates and humans using tractography  
589 have shown structural connections (for human: functional connectivity as well, see Deen et al., 2010)  
590 between the olfactory cortex and a partial region of aIns (Mufson & Mesulam, 1982; Carmichael et  
591 al., 1994; Ghaziri et al., 2015; Ghaziri et al., 2018). Specifically, as an important part of the secondary

592 olfactory cortex, alns is considered to engage in receiving and integrating the primary olfactory-  
593 affective information conveyed by the primary olfactory cortex. Moreover, the external sensory and  
594 affective messages seem to be already preprocessed in the primary olfactory cortex before they are  
595 conveyed to the secondary cortices (Soudry et al., 2011, for review; Seubert et al., 2013, for meta-  
596 analyses). Together with the evidence of higher brain activation in the right alns and left olfactory  
597 cortex for genuine disgust compared to pretended disgust, we speculate that the increased  
598 excitatory modulatory effect on the olfactory-to-alns connection may be related to the processing of  
599 passing messages of higher disgust emotion identified in others to activations related to affect  
600 processing, which may constitute the neural underpinning of the increased shared unpleasantness  
601 with others. This idea would also be in line with the theoretical framework proposed by Coll et al.  
602 (2017), that higher identified emotion in others contributes to stronger shared affect, and that the  
603 fully-fledged empathic response may be an integrated consequence of (at least) these two processes.  
604 We performed another DCM analysis between the right alns and the right olfactory cortex to test  
605 whether lateralization of the olfactory cortex had a large impact on the reliability of the modulatory  
606 effect we detected in DCM model with the left olfactory cortex. Results showed a very similar  
607 pattern to the DCM model with the left olfactory cortex, in the sense of replicating the excitatory  
608 modulatory effect on the connection of the olfactory cortex to alns for both conditions and absence  
609 of any condition-dependent modulatory effect on the connection of the opposite direction. Even  
610 though for this model we did not find a significant difference in the modulatory effects between  
611 genuine disgust and pretended disgust, these results at least attest to the robustness of the  
612 modulatory effect from the olfactory cortex, regardless of the left or right hemisphere, to the right  
613 alns.

614 We found the excitatory modulatory effect for genuine disgust was positively related to individual  
615 perspective-taking scores. This finding demonstrated that the connection of the olfactory cortex to  
616 alns for genuine disgust was related to the tendency of adopting the psychological point of view of  
617 others, which would finally contribute to the level of one's own affective responses to the emotion

618 felt by another person. This view is supported by the evidence that alns, especially the right alns, is  
619 implicated in distinct neural patterns of representing self- and other-related aversive states for  
620 disgust as well as pain (Corradi-Dell'Acqua et al., 2016). No association with any questionnaire was  
621 found for pretended disgust. Taking all these results together, we would speculate that for the  
622 genuine disgust condition, the olfactory cortex interacts with alns to achieve genuine identification  
623 of disgust in others. This would call for a higher demand to take the other's perspective, and in this  
624 way may contribute to the higher shared affect. For the pretended pain condition, sensory-driven  
625 ("automatic") emotion processing induced by the saliency of disgust expression interacts with the  
626 cognitive processes (i.e., knowing this person was merely acting out and did not feel any disgust at  
627 all), resulting in both a low level of identified disgust and shared affect. In this case, it may be less  
628 important to recruit the function of perspective-taking to share the emotions of others. However,  
629 further investigation is required to test these interpretations.

630 In conclusion, the current study largely replicates, as well as expands our previously reported  
631 findings on pain. Firstly, and similar to what we have shown for empathy for pain using the same  
632 experimental approach and within the same study, we provide evidence that responses related to  
633 empathy for disgust in alns can indeed be linked to the affective sharing rather than merely  
634 perceptual saliency. Secondly, we show how alns and the olfactory cortex, instead of alns and rSMG  
635 that we previously found in pain, orchestrate the tracking of disgust felt by another person. Taken  
636 together, these findings indicate that similar as well as distinct brain networks are engaged in  
637 processing different affective experiences, in this case pain and disgust, experienced by others. This  
638 refines and expands our understanding of the neural bases of empathy, from a dynamic and multi-  
639 modal perspective.

640

641

642 **References**

- 643 Ashburner, J. (2007). A fast diffeomorphic image registration algorithm. *NeuroImage*, *38*(1), 95-113.
- 644 doi: <https://doi.org/10.1016/j.neuroimage.2007.07.007>
- 645 Bagby, R. M., Taylor, G. J., & Parker, J. D. A. (1994). The twenty-item Toronto Alexithymia Scale: II.
- 646 Convergent, discriminant, and concurrent validity. *Journal of Psychosomatic Research*, *38*(1),
- 647 33-40. doi: [http://doi.org/10.1016/0022-3999\(94\)90006-X](http://doi.org/10.1016/0022-3999(94)90006-X)
- 648 Batchelder, L. (2015). *Characterising the components of empathy: implications for models of autism*.
- 649 University of Bath.
- 650 Batchelder, L., Brosnan, M., & Ashwin, C. (2017). The Development and Validation of the Empathy
- 651 Components Questionnaire (ECQ). *PLOS ONE*, *12*(1), e0169185. doi:
- 652 <http://doi.org/10.1371/journal.pone.0169185>
- 653 Bensafi, M., Sobel, N., & Khan, R. M. (2007). Hedonic-Specific Activity in Piriform Cortex During Odor
- 654 Imagery Mimics That During Odor Perception. *Journal of Neurophysiology*, *98*(6), 3254-3262.
- 655 doi: <http://doi.org/10.1152/jn.00349.2007>
- 656 Bukowski, H., Tik, M., Silani, G., Ruff, C. C., Windischberger, C., & Lamm, C. (2020). When differences
- 657 matter: rTMS/fMRI reveals how differences in dispositional empathy translate to distinct
- 658 neural underpinnings of self-other distinction in empathy. *Cortex*, *128*, 143-161. doi:
- 659 <https://doi.org/10.1016/j.cortex.2020.03.009>
- 660 Carmichael, S. T., Clugnet, M.-C., & Price, J. L. (1994). Central olfactory connections in the macaque
- 661 monkey. *Journal of Comparative Neurology*, *346*(3), 403-434. doi:
- 662 <https://doi.org/10.1002/cne.903460306>
- 663 Coll, M.-P., Viding, E., Rütgen, M., Silani, G., Lamm, C., Catmur, C., & Bird, G. (2017). Are we really
- 664 measuring empathy? Proposal for a new measurement framework. *Neuroscience &*
- 665 *Biobehavioral Reviews*, *83*, 132-139. doi: <https://doi.org/10.1016/j.neubiorev.2017.10.009>

- 666 Corradi-Dell'Acqua, C., Tusche, A., Vuilleumier, P., & Singer, T. (2016). Cross-modal representations  
667 of first-hand and vicarious pain, disgust and fairness in insular and cingulate cortex. *Nature*  
668 *Communications*, 7(1), 10904. doi: 10.1038/ncomms10904
- 669 Davis, M. H. (1980). A multidimensional approach to individual differences in empathy.
- 670 Deen, B., Pitskel, N. B., & Pelphrey, K. A. (2010). Three Systems of Insular Functional Connectivity  
671 Identified with Cluster Analysis. *Cerebral Cortex*, 21(7), 1498-1506. doi:  
672 <http://dx.doi.org/10.1093/cercor/bhq186>
- 673 Desikan, R. S., Ségonne, F., Fischl, B., Quinn, B. T., Dickerson, B. C., Blacker, D., Buckner, R. L., Dale, A.  
674 M., Maguire, R. P., Hyman, B. T., Albert, M. S., & Killiany, R. J. (2006). An automated labeling  
675 system for subdividing the human cerebral cortex on MRI scans into gyral based regions of  
676 interest. *NeuroImage*, 31(3), 968-980. doi:  
677 <https://doi.org/10.1016/j.neuroimage.2006.01.021>
- 678 Djordjevic, J., Zatorre, R. J., Petrides, M., Boyle, J. A., & Jones-Gotman, M. (2005). Functional  
679 neuroimaging of odor imagery. *NeuroImage*, 24(3), 791-801. doi:  
680 <https://doi.org/10.1016/j.neuroimage.2004.09.035>
- 681 Fallon, N., Roberts, C., & Stancak, A. (2020). Shared and distinct functional networks for empathy  
682 and pain processing: A systematic review and meta-analysis of fMRI studies. *Social Cognitive*  
683 *and Affective Neuroscience*. doi: <https://doi.org/10.1093/scan/nsaa090>
- 684 Faul, F., Erdfelder, E., Lang, A.-G., & Buchner, A. (2007). G\*Power 3: A flexible statistical power  
685 analysis program for the social, behavioral, and biomedical sciences. *Behavior Research*  
686 *Methods*, 39(2), 175-191. doi: 10.3758/BF03193146
- 687 Ghaziri, J., Tucholka, A., Girard, G., Boucher, O., Houde, J.-C., Descoteaux, M., Obaid, S., Gilbert, G.,  
688 Rouleau, I., & Nguyen, D. K. (2018). Subcortical structural connectivity of insular subregions.  
689 *Scientific Reports*, 8(1), 8596. doi: <http://doi.org/10.1038/s41598-018-26995-0>

- 690 Ghaziri, J., Tucholka, A., Girard, G., Houde, J.-C., Boucher, O., Gilbert, G., Descoteaux, M., Lippé, S.,  
691 Rainville, P., & Nguyen, D. K. (2015). The Corticocortical Structural Connectivity of the  
692 Human Insula. *Cerebral Cortex*, 27(2), 1216-1228. doi: <http://doi.org/10.1093/cercor/bhv308>
- 693 Gläscher, J., & Gitelman, D. (2008). Contrast weights in flexible factorial design with multiple groups  
694 of subjects. *SPM@ JISCMAIL. AC. UK) Sml, editor*, 1-12.
- 695 Gorgolewski, K., Auer, T., Calhoun, V., Craddock, R. C., Das, S., Duff, E., Flandin, G., Ghosh, S., Glatard,  
696 T., Halchenko, Y., Handwerker, D., Hanke, M., Keator, D., Li, X., Michael, Z., Maumet, C.,  
697 Nichols, B. N., Nichols, T., Pellman, J., Poline, J.-B., Rokem, A., Schaefer, G., Sochat, V.,  
698 Triplett, W., Turner, J., Varoquaux, G., & Poldrack, R. (2016). The brain imaging data  
699 structure, a format for organizing and describing outputs of neuroimaging experiments.  
700 *Scientific Data*, 3(1), 160044. doi: <http://doi.org/10.1038/sdata.2016.44>
- 701 Gorgolewski, K., Burns, C., Madison, C., Clark, D., Halchenko, Y., Waskom, M., & Ghosh, S. (2011).  
702 Nipype: A Flexible, Lightweight and Extensible Neuroimaging Data Processing Framework in  
703 Python. *Frontiers in Neuroinformatics*, 5(13). doi: <http://doi.org/10.3389/fninf.2011.00013>
- 704 Hoffmann, F., Koehne, S., Steinbeis, N., Dziobek, I., & Singer, T. (2016). Preserved Self-other  
705 Distinction During Empathy in Autism is Linked to Network Integrity of Right Supramarginal  
706 Gyrus. *Journal of Autism and Developmental Disorders*, 46(2), 637-648. doi:  
707 <http://doi.org/10.1007/s10803-015-2609-0>
- 708 Holmes, E., Zeidman, P., Friston, K. J., & Griffiths, T. D. (2020). Difficulties with Speech-in-Noise  
709 Perception Related to Fundamental Grouping Processes in Auditory Cortex. *Cerebral Cortex*,  
710 31(3), 1582-1596. doi: <http://doi.org/10.1093/cercor/bhaa311>
- 711 James, G., Witten, D., Hastie, T., & Tibshirani, R. (2013). *An introduction to statistical learning* (Vol.  
712 112): Springer.
- 713 Jauniaux, J., Khatibi, A., Rainville, P., & Jackson, P. L. (2019). A meta-analysis of neuroimaging studies  
714 on pain empathy: investigating the role of visual information and observers' perspective.



- 715            *Social Cognitive and Affective Neuroscience*, 14(8), 789-813. doi:
- 716            <https://doi.org/10.1093/scan/nsz055>
- 717 Lamm, C., Decety, J., & Singer, T. (2011). Meta-analytic evidence for common and distinct neural
- 718            networks associated with directly experienced pain and empathy for pain. *NeuroImage*,
- 719            54(3), 2492-2502. doi: <https://doi.org/10.1016/j.neuroimage.2010.10.014>
- 720 Menard, S. (2002). *Applied logistic regression analysis* (Vol. 106): Sage.
- 721 Mufson, E. J., & Mesulam, M.-M. (1982). Insula of the old world monkey. II: Afferent cortical input
- 722            and comments on the claustrum. *Journal of Comparative Neurology*, 212(1), 23-37. doi:
- 723            <https://doi.org/10.1002/cne.902120103>
- 724 Power, J. D., Barnes, K. A., Snyder, A. Z., Schlaggar, B. L., & Petersen, S. E. (2012). Spurious but
- 725            systematic correlations in functional connectivity MRI networks arise from subject motion.
- 726            *NeuroImage*, 59(3), 2142-2154. doi: <https://doi.org/10.1016/j.neuroimage.2011.10.018>
- 727 Power, J. D., Mitra, A., Laumann, T. O., Snyder, A. Z., Schlaggar, B. L., & Petersen, S. E. (2014).
- 728            Methods to detect, characterize, and remove motion artifact in resting state fMRI.
- 729            *NeuroImage*, 84, 320-341. doi: <https://doi.org/10.1016/j.neuroimage.2013.08.048>
- 730 Rütgen, M., Seidel, E. M., Silani, G., Rieckens, I., Hummer, A., Windischberger, C., Petrovic, P., &
- 731            Lamm, C. (2015). Placebo analgesia and its opioidergic regulation suggest that empathy for
- 732            pain is grounded in self pain. *Proceedings of the National Academy of Sciences*, 112(41),
- 733            E5638-E5646. doi: <https://doi.org/10.1073/pnas.1511269112>
- 734 Savic, I., Gulyas, B., Larsson, M., & Roland, P. (2000). Olfactory Functions Are Mediated by Parallel
- 735            and Hierarchical Processing. *Neuron*, 26(3), 735-745. doi: [https://doi.org/10.1016/S0896-](https://doi.org/10.1016/S0896-6273(00)81209-X)
- 736            [6273\(00\)81209-X](https://doi.org/10.1016/S0896-6273(00)81209-X)
- 737 Schienle, A., Höfler, C., Keck, T., & Wabnegger, A. (2020). Neural underpinnings of perception and
- 738            experience of disgust in individuals with a reduced sense of smell: An fMRI study.
- 739            *Neuropsychologia*, 141, 107411. doi:
- 740            <https://doi.org/10.1016/j.neuropsychologia.2020.107411>

- 741 Schulze, P., Bestgen, A.-K., Lech, R. K., Kuchinke, L., & Suchan, B. (2017). Preprocessing of emotional  
742 visual information in the human piriform cortex. *Scientific Reports*, 7(1), 9191. doi:  
743 <http://doi.org/10.1038/s41598-017-09295-x>
- 744 Seubert, J., Freiherr, J., Djordjevic, J., & Lundström, J. N. (2013). Statistical localization of human  
745 olfactory cortex. *NeuroImage*, 66, 333-342. doi:  
746 <https://doi.org/10.1016/j.neuroimage.2012.10.030>
- 747 Seubert, J., Kellermann, T., Loughhead, J., Boers, F., Brensinger, C., Schneider, F., & Habel, U. (2010a).  
748 Processing of disgusted faces is facilitated by odor primes: A functional MRI study.  
749 *NeuroImage*, 53(2), 746-756. doi: <https://doi.org/10.1016/j.neuroimage.2010.07.012>
- 750 Seubert, J., Loughhead, J., Kellermann, T., Boers, F., Brensinger, C. M., & Habel, U. (2010b).  
751 Multisensory integration of emotionally valenced olfactory-visual information in patients  
752 with schizophrenia and healthy controls. *Journal of psychiatry & neuroscience : JPN*, 35(3),  
753 185-194. doi: 10.1503/jpn.090094
- 754 Sharvit, G., Lin, E., Vuilleumier, P., & Corradi-Dell'Acqua, C. (2020). Does inappropriate behavior hurt  
755 or stink? The interplay between neural representations of somatic experiences and moral  
756 decisions. *Science Advances*, 6(42), eaat4390. doi: <http://doi.org/10.1126/sciadv.aat4390>
- 757 Sharvit, G., Vuilleumier, P., Delplanque, S., & Corradi-Dell'Acqua, C. (2015). Cross-modal and  
758 modality-specific expectancy effects between pain and disgust. *Sci Rep*, 5, 17487. doi:  
759 <https://doi.org/10.1038/srep17487>
- 760 Silani, G., Lamm, C., Ruff, C. C., & Singer, T. (2013). Right Supramarginal Gyrus Is Crucial to Overcome  
761 Emotional Egocentricity Bias in Social Judgments. *The Journal of Neuroscience*, 33(39),  
762 15466-15476. doi: <http://doi.org/10.1523/jneurosci.1488-13.2013>
- 763 Sladky, R., Friston, K. J., Tröstl, J., Cunnington, R., Moser, E., & Windischberger, C. (2011). Slice-timing  
764 effects and their correction in functional MRI. *NeuroImage*, 58(2), 588-594. doi:  
765 <https://doi.org/10.1016/j.neuroimage.2011.06.078>

- 766 Soudry, Y., Lemogne, C., Malinvaud, D., Consoli, S. M., & Bonfils, P. (2011). Olfactory system and  
767 emotion: Common substrates. *European Annals of Otorhinolaryngology, Head and Neck*  
768 *Diseases*, 128(1), 18-23. doi: <https://doi.org/10.1016/j.anorl.2010.09.007>
- 769 Steinbeis, N., Bernhardt, B. C., & Singer, T. (2015). Age-related differences in function and structure  
770 of rSMG and reduced functional connectivity with DLPFC explains heightened emotional  
771 egocentricity bias in childhood. *Social cognitive and affective neuroscience*, 10(2), 302-310.  
772 doi: <https://doi.org/10.1093/scan/nsu057>
- 773 Tzourio-Mazoyer, N., Landeau, B., Papathanassiou, D., Crivello, F., Etard, O., Delcroix, N., Mazoyer, B.,  
774 & Joliot, M. (2002). Automated Anatomical Labeling of Activations in SPM Using a  
775 Macroscopic Anatomical Parcellation of the MNI MRI Single-Subject Brain. *NeuroImage*,  
776 15(1), 273-289. doi: <https://doi.org/10.1006/nimg.2001.0978>
- 777 Xiong, R.-C., Fu, X., Wu, L.-Z., Zhang, C.-H., Wu, H.-X., Shi, Y., & Wu, W. (2019). Brain pathways of  
778 pain empathy activated by pained facial expressions: a meta-analysis of fMRI using the  
779 activation likelihood estimation method. *Neural regeneration research*, 14(1), 172-178. doi:  
780 <http://doi.org/10.4103/1673-5374.243722>
- 781 Zeidman, P., Jafarian, A., Corbin, N., Seghier, M. L., Razi, A., Price, C. J., & Friston, K. J. (2019a). A  
782 guide to group effective connectivity analysis, part 1: First level analysis with DCM for fMRI.  
783 *NeuroImage*, 200, 174-190. doi: <https://doi.org/10.1016/j.neuroimage.2019.06.031>
- 784 Zeidman, P., Jafarian, A., Seghier, M. L., Litvak, V., Cagnan, H., Price, C. J., & Friston, K. J. (2019b). A  
785 guide to group effective connectivity analysis, part 2: Second level analysis with PEB.  
786 *NeuroImage*, 200, 12-25. doi: <https://doi.org/10.1016/j.neuroimage.2019.06.032>
- 787 Zelano, C., Mohanty, A., & Gottfried, Jay A. (2011). Olfactory Predictive Codes and Stimulus  
788 Templates in Piriform Cortex. *Neuron*, 72(1), 178-187. doi:  
789 <https://doi.org/10.1016/j.neuron.2011.08.010>

- 790 Zhao, Y., Rütgen, M., Zhang, L., & Lamm, C. (2021a). Pharmacological fMRI provides evidence for  
791 opioidergic modulation of discrimination of facial pain expressions. *Psychophysiology*, *58*(2),  
792 e13717. doi: <https://doi.org/10.1111/psyp.13717>
- 793 Zhao, Y., Zhang, L., Rütgen, M., Sladky, R., & Lamm, C. (2021b). Neural dynamics between anterior  
794 insular cortex and right supramarginal gyrus dissociate genuine affect sharing from  
795 perceptual saliency of pretended pain. *eLife*, *10*, e69994. doi:  
796 <http://doi.org/10.7554/eLife.69994>
- 797 Zhou, F., Li, J., Zhao, W., Xu, L., Zheng, X., Fu, M., Yao, S., Kendrick, K. M., Wager, T. D., & Becker, B.  
798 (2020). Empathic pain evoked by sensory and emotional-communicative cues share common  
799 and process-specific neural representations. *eLife*, *9*, e56929. doi:  
800 <http://doi.org/10.7554/eLife.56929>
- 801 Zhou, G., Lane, G., Cooper, S., Kahnt, T., & Zelano, C. (2019). Characterizing functional pathways of  
802 the human olfactory system. *eLife*, *8*, e47177. doi: <http://doi.org/10.7554/eLife.47177>
- 803
